# Supplementary material
Source: publisher site journal article supplement (https://www.spandidos-publications.com/1941/downloadSupplementary)
Supplement: Supplementary file 1 [file downloadSupplementary]

Figure S1. Predicted target miRNAs of TP73-AS1, and their expression in NSCLC cells following TP73-AS1 knockdown. Target miRNAs of TP73-AS1 were predicted using the microRNA.org software, and the expression of target miRNAs in NSCLC cells following TP73-AS1 knockdown was detected using reverse transcription-quantitative PCR. miR-34a-5p was significantly upregulated after TP73-AS1 knockdown compared with that in cells transfected with siNC. \*P<0.05 vs. si-NC. TP73-AS1, tumor protein 73 antisense RNA 1; NSCLC, non-small cell lung cancer; si, small interfering; miR/miRNA, microRNA; NC, negative control.

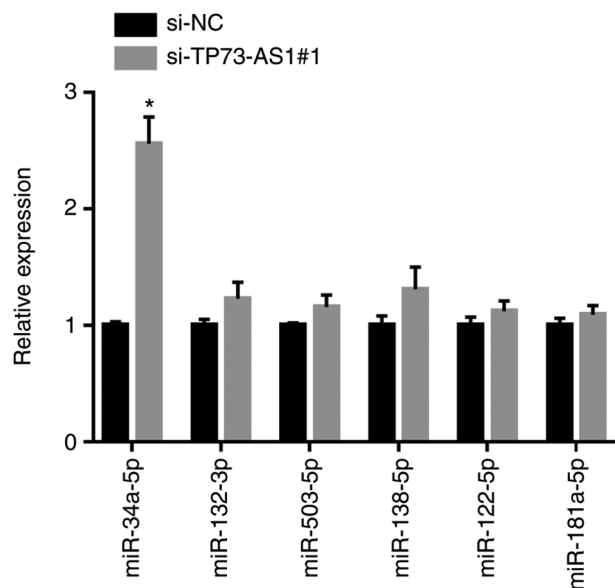

Figure S2. Predicted target mRNAs of miR-34a-5p, and their expression in NSCLC cells following miR-34a-5p transfection. Target mRNAs of miR-34a-5p were predicted using the Starbase software, and the mRNA expression level of target mRNAs in NSCLC cells with miR-34a-5p transfection was measured using reverse transcription-quantitative PCR. TRIM29 was significantly downregulated after miR-34a-5p transfection compared with that in cells transfected with miR-NC. TRIM29, tripartite motif-containing 29; NSCLC, non-small \*P<0.05 vs. miR-NC. cell lung cancer; miR, microRNA; NC, negative control; CCND1, cyclin D1; XBP1, X-box binding protein 1; FOXF1, forkhead box P1; SOX4; SRY-box transcription factor 4; IGFBP3, insulin like growth factor binding protein 4.

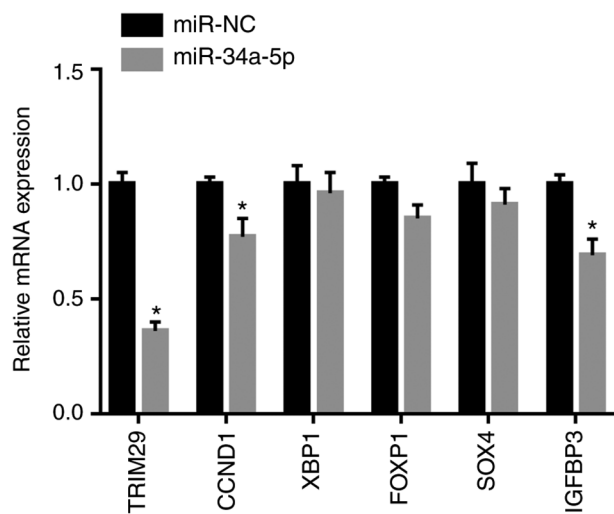

Table SI. The sectional targets of TP73-AS1 by predicted by microRNA.org.

| lncRNA                                                     | Target miRNAs                                                                     |
|------------------------------------------------------------|-----------------------------------------------------------------------------------|
| TP73-AS1                                                   | miR-34a-5p<br>miR-132-3p<br>miR-503-5p<br>miR-138-5p<br>miR-122-5p<br>miR-181a-5p |
| TP73-AS1, tumor protein 73 antisense RNA 1; miR, microRNA. |                                                                                   |

Table SII. The sectional targets of miR-34a-5p predicted by the Starbase software.

| miRNA      | Target mRNAs                                       |
|------------|----------------------------------------------------|
| miR-34a-5p | TRIM29<br>CCND1<br>XBP1<br>FOXP1<br>SOX4<br>IGFBP3 |

TRIM29, tripartite motif-containing 29; miR, microRNA; CCND1, cyclin D1; XBP1, X-box binding protein 1; FOXP1, forkhead box P1; SOX4; SRY-box transcription factor 4; IGFBP3, insulin like growth factor binding protein 4.
